# Supplementary material for: Determination of the Absolute Configuration of Bioactive Indole-Containing Pyrazino[2,1-b]quinazoline-3,6-diones and Study of Their In Vitro Metabolic Profile
Source: MDPI journal article supplement (doi:10.3390/molecules26165070), 2021-08-21
Supplement: s1 [file s1]

# Determination of the absolute configuration of bioactive indole-containing pyrazino[2,1-*b*]quinazoline-3,6-diones and study of their *in vitro* metabolic profile

Solida Long <sup>1,2,†</sup>, Izadora L. Furlani <sup>3,†</sup>, Juliana M. de Oliveira <sup>3</sup>, Diana I. S. P. Resende <sup>1,4</sup>, Artur M. S. Silva <sup>5</sup>, Luís Gales <sup>6,7</sup>, José A. Pereira <sup>6</sup>, Anake Kijjoa <sup>4,6</sup>, Quezia B. Cass <sup>3</sup>, Regina V. Oliveira <sup>3,\*</sup>, Emília Sousa <sup>1,4,\*</sup>, Madalena M. M. Pinto <sup>1,4</sup>

<sup>1</sup> LQOF - Laboratório de Química Orgânica e Farmacêutica, Departamento de Ciências Químicas, Faculdade de Farmácia, Universidade do Porto, Rua de Jorge Viterbo Ferreira, 228, 4050-313 Porto, Portugal; up201502099@ff.up.pt (S.L.); dresende@ff.up.pt (D.I.S.P.R.); esousaf.up.pt (E.S.); madalena@ff.up.pt (M.M.M.P.)

<sup>2</sup> Department of Bioengineering, Faculty of Engineering, Royal University of Phnom Penh, Russian federation Blevd. Phnom Penh, Cambodia; long.solida@rupp.edu.kh (S.L)

<sup>3</sup> SEPARARE – Núcleo de Pesquisa em Cromatografia, Departamento de Química, Universidade Federal de São Carlos, Rodovia Washington Luiz, km 235, 13565-905 São Carlos, Brazil; [izadora.furlani@gmail.com](mailto:izadora.furlani@gmail.com) (I.L.F.); [juli\\_magalhaes\\_o@hotmail.com](mailto:juli_magalhaes_o@hotmail.com) (J.M.de O); [qcass@ufscar.br](mailto:qcass@ufscar.br) (Q.B.C.); [oliveirarv@ufscar.br](mailto:oliveirarv@ufscar.br) (R.V.O.)

<sup>4</sup> CIIMAR - Centro Interdisciplinar de Investigação Marinha e Ambiental, Terminal de Cruzeiros do Porto de Leixões, Av. General Norton de Matos S/N, 4450-208 Matosinhos, Porto, Portugal.

<sup>5</sup> LAQV-REQUIMTE - Departamento de Química, Universidade de Aveiro, 3810-193 Aveiro, Portugal; [artur.silva@ua.pt](mailto:artur.silva@ua.pt) (A.M.S.S.)

<sup>6</sup> ICBAS - Instituto de Ciências Biomédicas Abel Salazar, Universidade do Porto, Portugal; [ankijjoa@icbas.up.pt](mailto:ankijjoa@icbas.up.pt) (A.K.); [jpereira@icbas.up.pt](mailto:jpereira@icbas.up.pt) (J.A.P.)

<sup>7</sup> i3S-IBMC-Instituto de Biologia Molecular e Celular, Universidade do Porto, Porto, Portugal; [lmgales@gmail.com](mailto:lmgales@gmail.com) (L.G.)

\* Correspondence: [esousa@ff.up.pt](mailto:esousa@ff.up.pt); Tel.: +351 220 428 689; [oliveirarv@ufscar.br](mailto:oliveirarv@ufscar.br); Tel: +55-16- 3306-6837

† Both authors contributed equally to this work

## Content

|                                                                                                                                                                                                         |    |
|---------------------------------------------------------------------------------------------------------------------------------------------------------------------------------------------------------|----|
| Figure S1. Model of the most abundant conformation of 1 (B3LYP/6-311+G(2d,p) lowest energy conformer accounting for 51% of conformer population) in its (1S,4R) configuration, as assigned by ECD. .... | 2  |
| Figure S2. Experimental ECD spectrum (solid line, left axis) of (-)-1 and theoretical ECD spectrum (dotted line, right axis) of (1S,4R)-1 configuration. ....                                           | 2  |
| Figure S3. LC-HRMS/MS spectrum of fiscalin B (1), <i>m/z</i> 387.1826. ....                                                                                                                             | 3  |
| Figure S4. Proposed fragmentation pathways of fiscalin B (1) in positive ion mode. ....                                                                                                                 | 3  |
| Figure S5. LC-HRMS/MS spectrum of M1, <i>m/z</i> 403.1765. ....                                                                                                                                         | 4  |
| Figure S6. Proposed fragmentation pathways of metabolite M1. ....                                                                                                                                       | 4  |
| Figure S7. LC-HRMS/MS spectrum of M2, <i>m/z</i> 419.1708. ....                                                                                                                                         | 5  |
| Figure S8. Proposed fragmentation pathways of metabolite M2. ....                                                                                                                                       | 5  |
| Figure S9. LC-HRMS/MS spectrum of M3, <i>m/z</i> 421.1863. ....                                                                                                                                         | 6  |
| Figure S10. Proposed fragmentation pathways of metabolite M3. ....                                                                                                                                      | 6  |
| Figure S11. LC-HRMS/MS spectrum of fiscalin B chloro derivative (2), <i>m/z</i> 469.1193. ....                                                                                                          | 8  |
| Figure S12. Proposed fragmentation pathways of fiscalin B chloro derivative (2) in positive ion mode. ....                                                                                              | 8  |
| Figure S13. LC-HRMS/MS spectrum of M4, <i>m/z</i> 485.1146. ....                                                                                                                                        | 9  |
| Figure S14. Proposed fragmentation pathways of metabolite M4. ....                                                                                                                                      | 9  |
| Figure S15. LC-HRMS/MS spectrum of M5, <i>m/z</i> 501.1105. ....                                                                                                                                        | 10 |
| Figure S16. Proposed fragmentation pathways of metabolite M5. ....                                                                                                                                      | 10 |

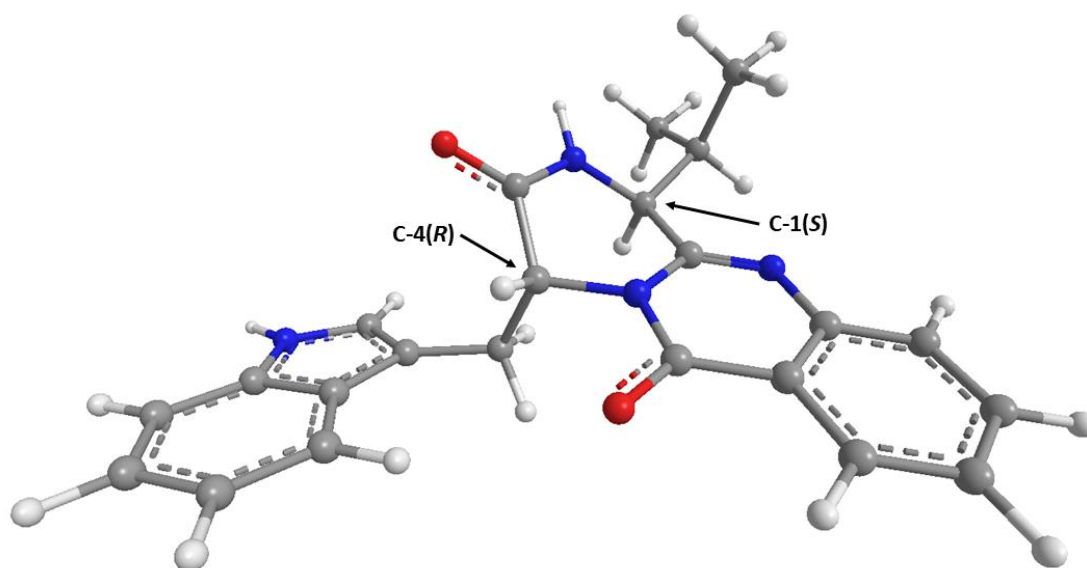

Figure S1. Model of the most abundant conformation of **1** (B3LYP/6-311+G(2d,p) lowest energy conformer accounting for 51% of conformer population) in its (1*S*,4*R*) configuration, as assigned by ECD.

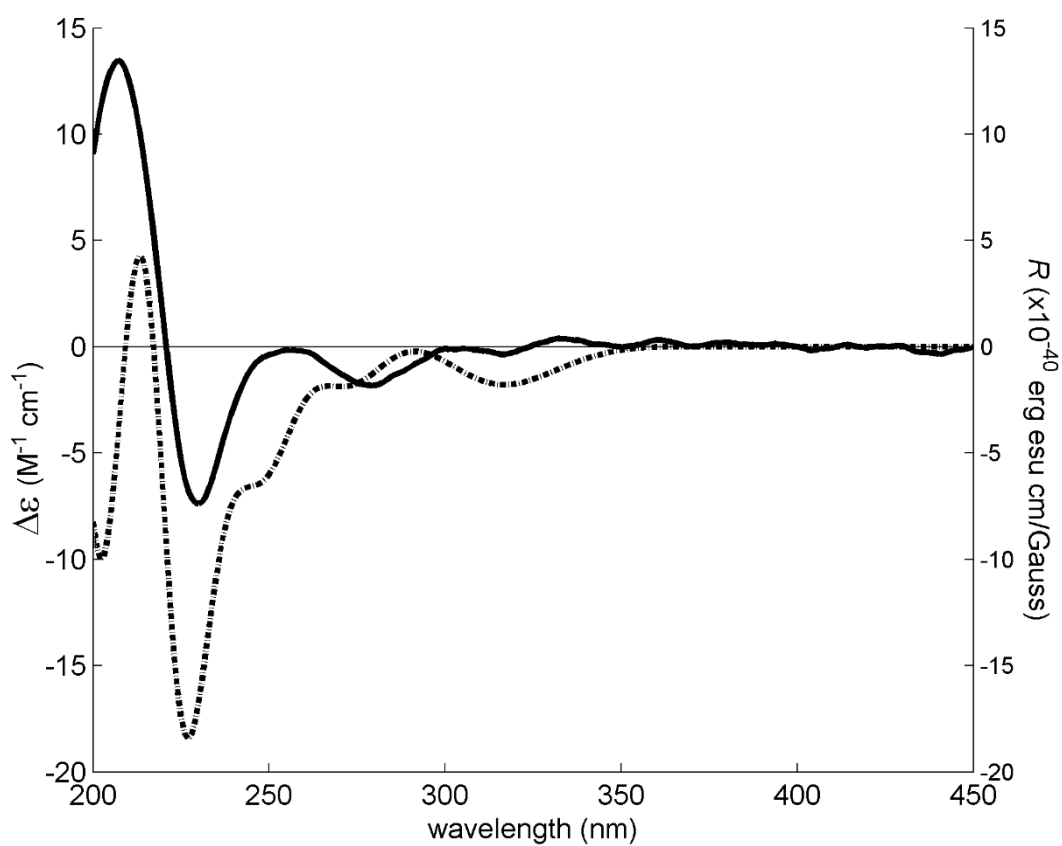

Figure S2. Experimental ECD spectrum (solid line, left axis) of (-)-**1** and theoretical ECD spectrum (dotted line, right axis) of (1*S*,4*R*)-**1** configuration.

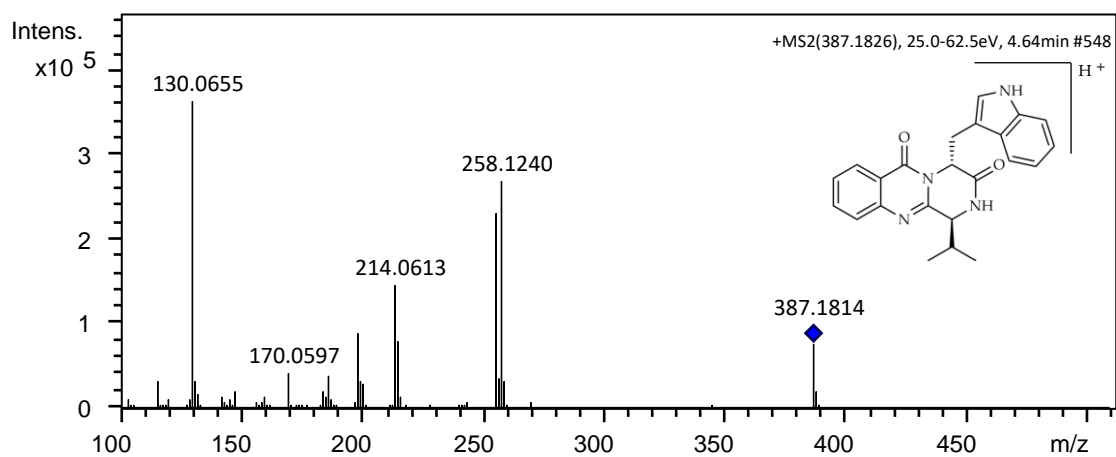

Figure S3. LC-HRMS/MS spectrum of fiscalin B (**1**),  $m/z$  387.1826.

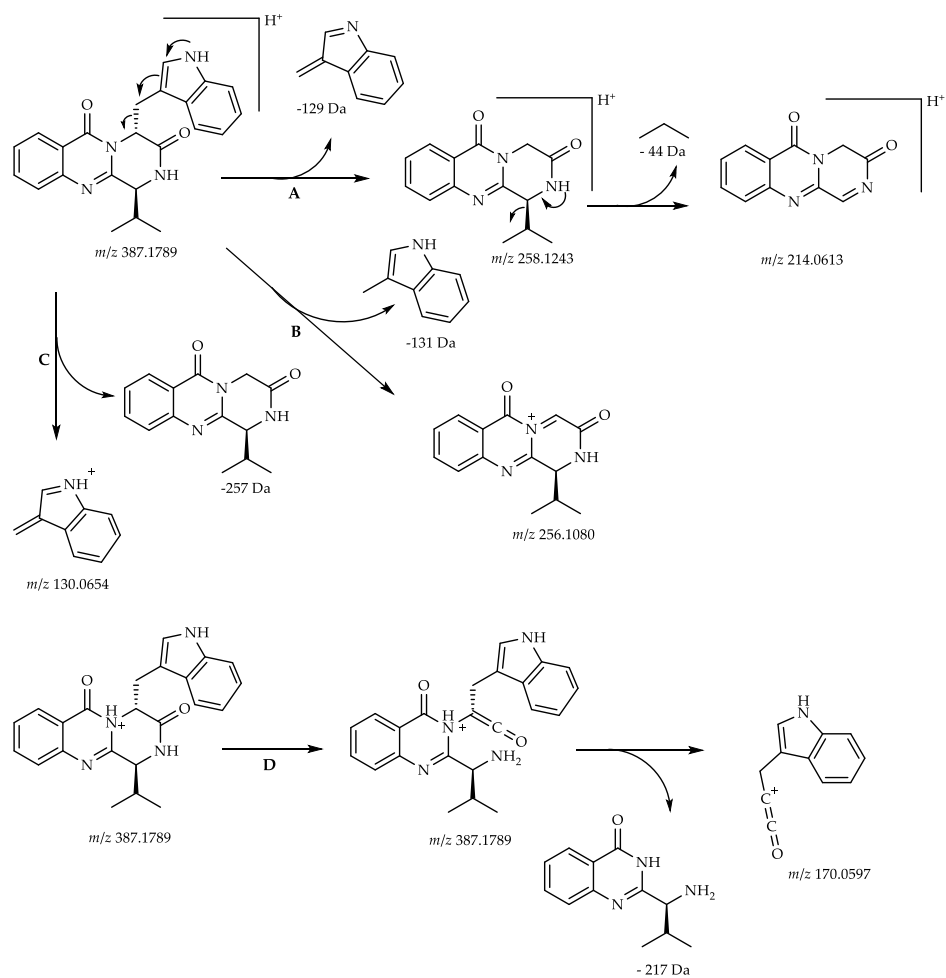

Figure S4. Proposed fragmentation pathways of fiscalin B (**1**) in positive ion mode.

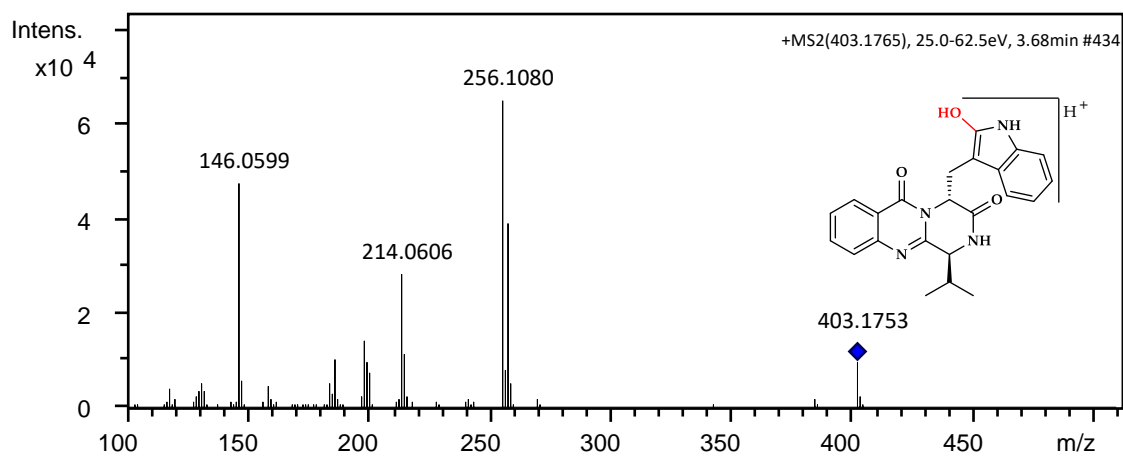

Figure S5. LC-HRMS/MS spectrum of M1,  $m/z$  403.1765.

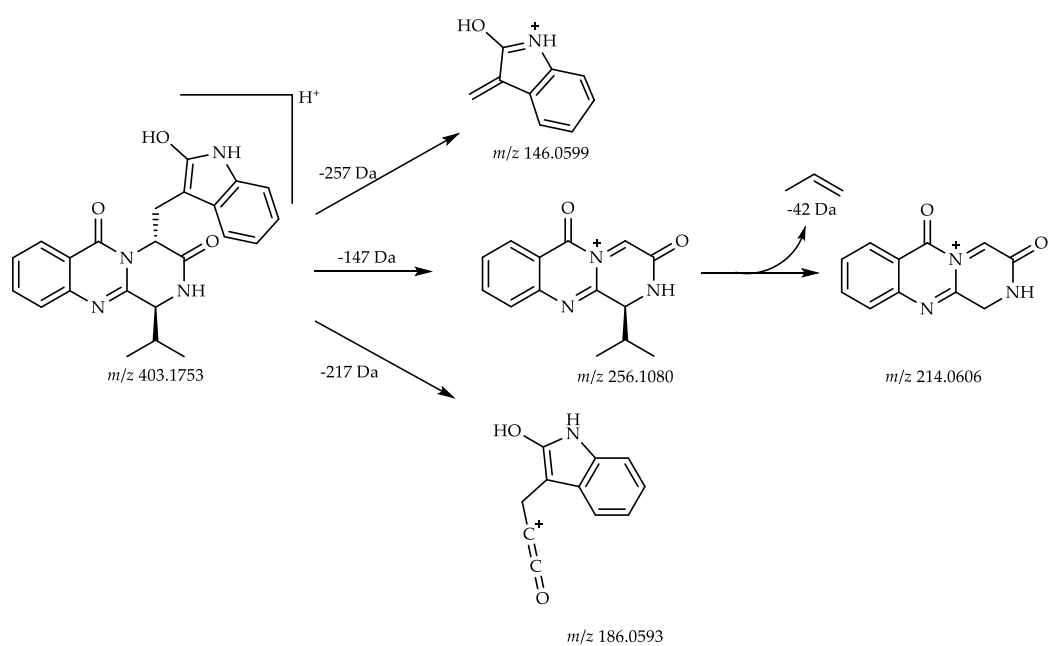

Figure S6. Proposed fragmentation pathways of metabolite M1.

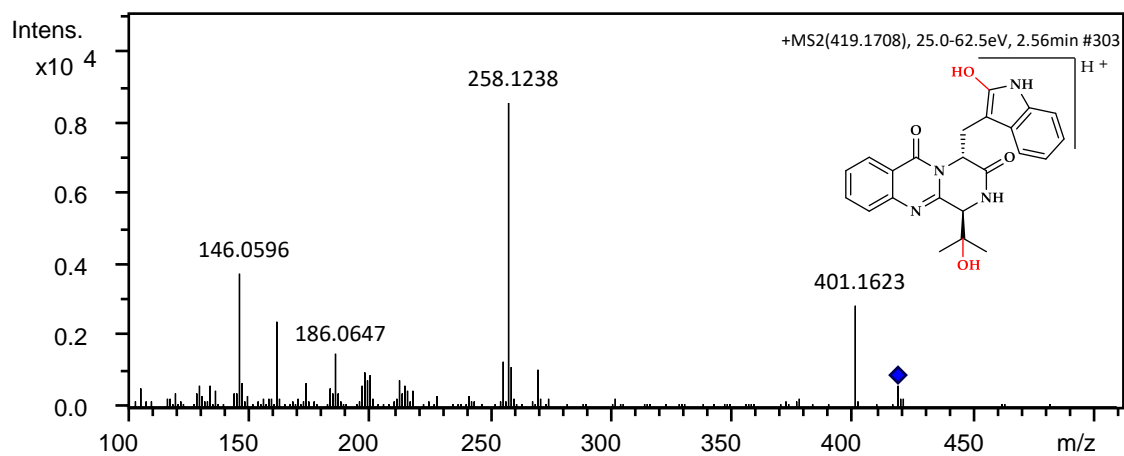

Figure S7. LC-HRMS/MS spectrum of M2,  $m/z$  419.1708.

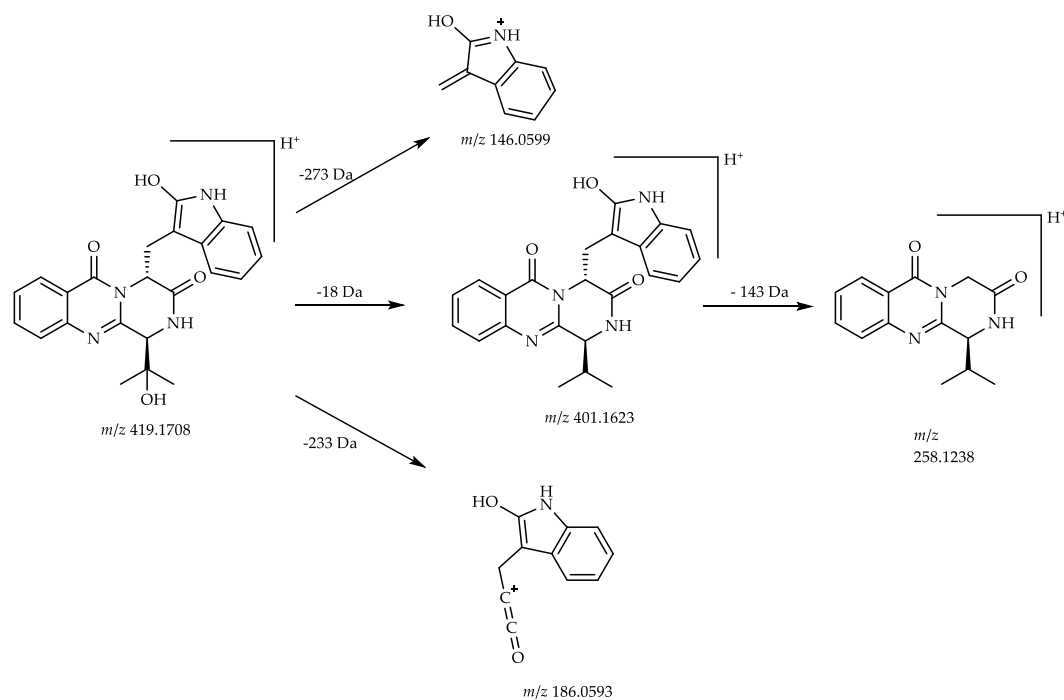

Figure S8. Proposed fragmentation pathways of metabolite M2.

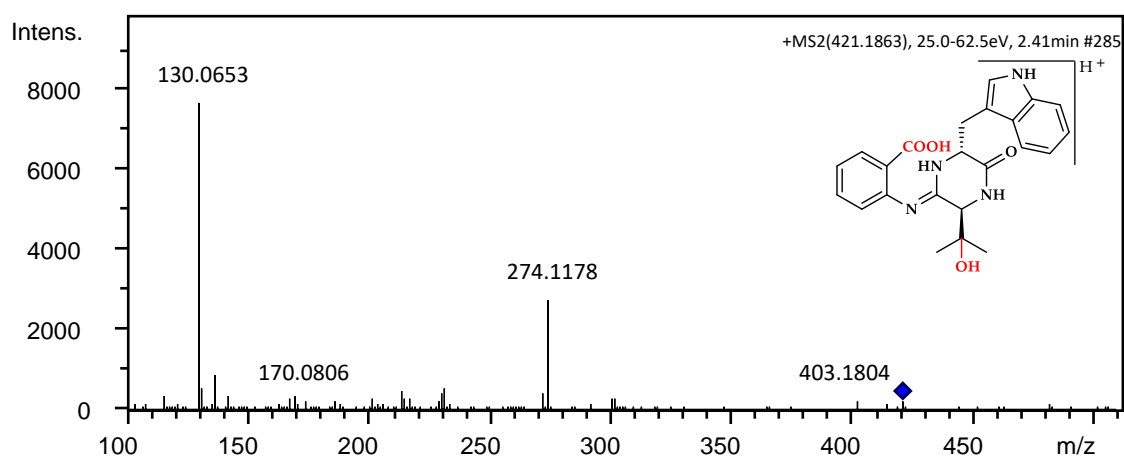

Figure S9. LC-HRMS/MS spectrum of M3,  $m/z$  421.1863.

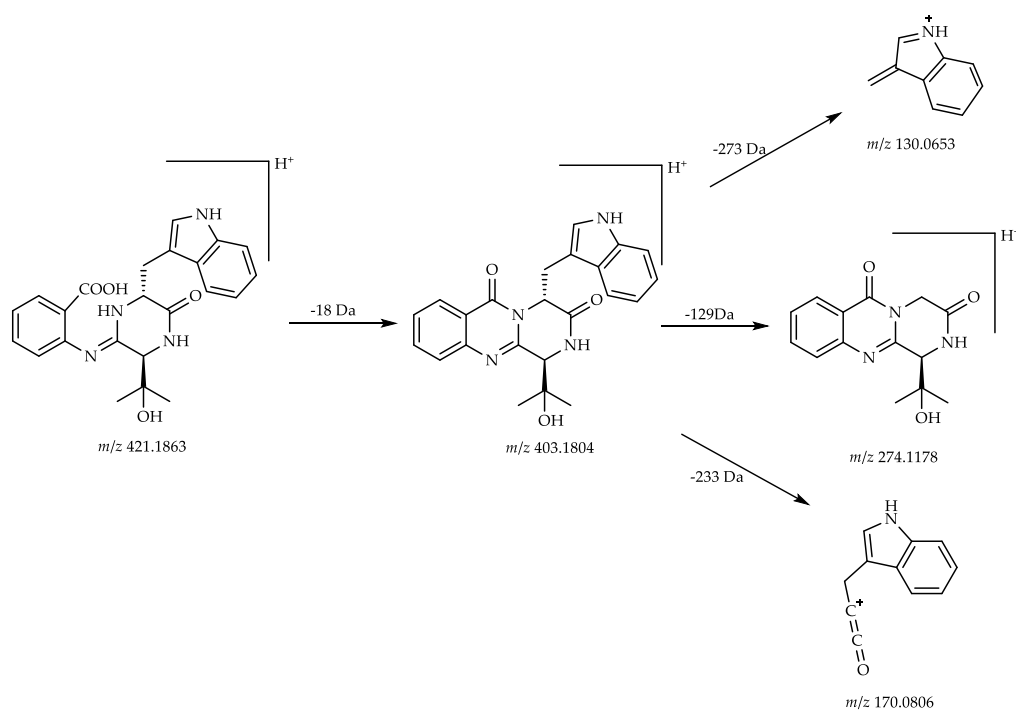

Figure S10. Proposed fragmentation pathways of metabolite M3.

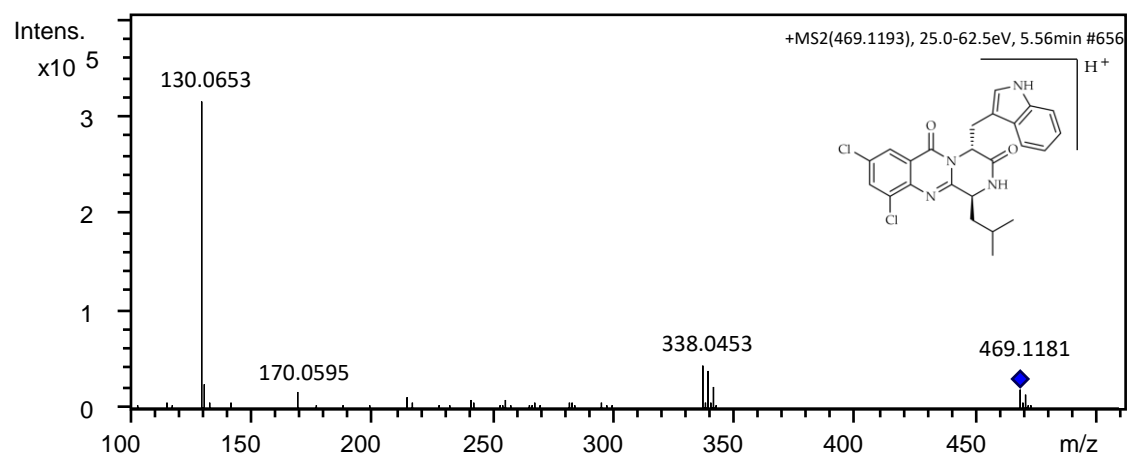

Figure S11. LC-HRMS/MS spectrum of fiscalin B chloro derivative (**2**),  $m/z$  469.1193 in positive ion mode

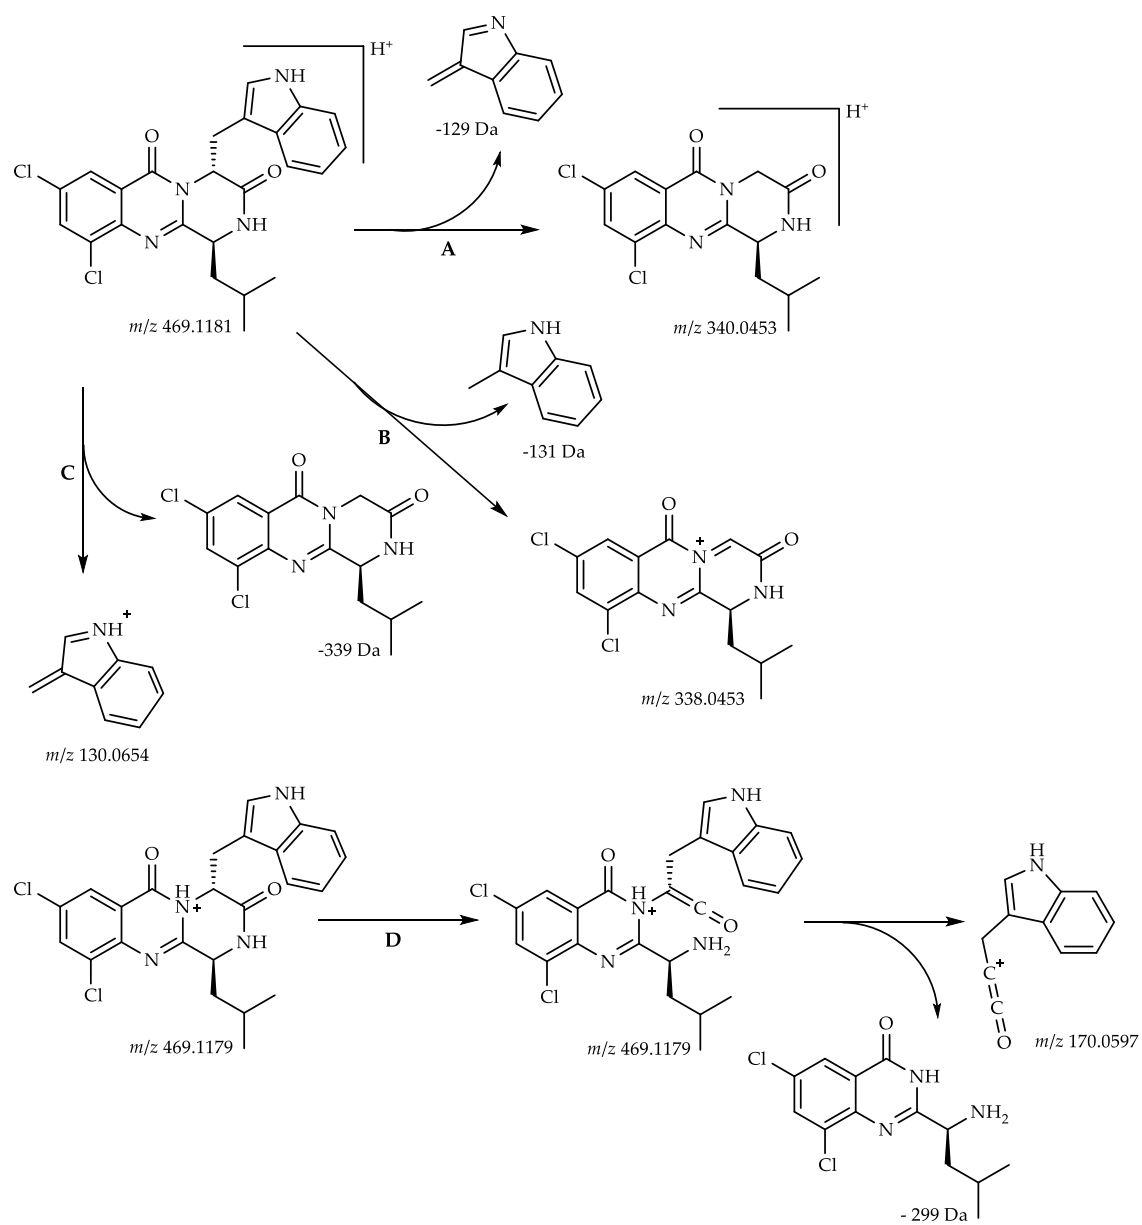

Figure S12. Proposed fragmentation pathways of fiscalin B chloro derivative (2).



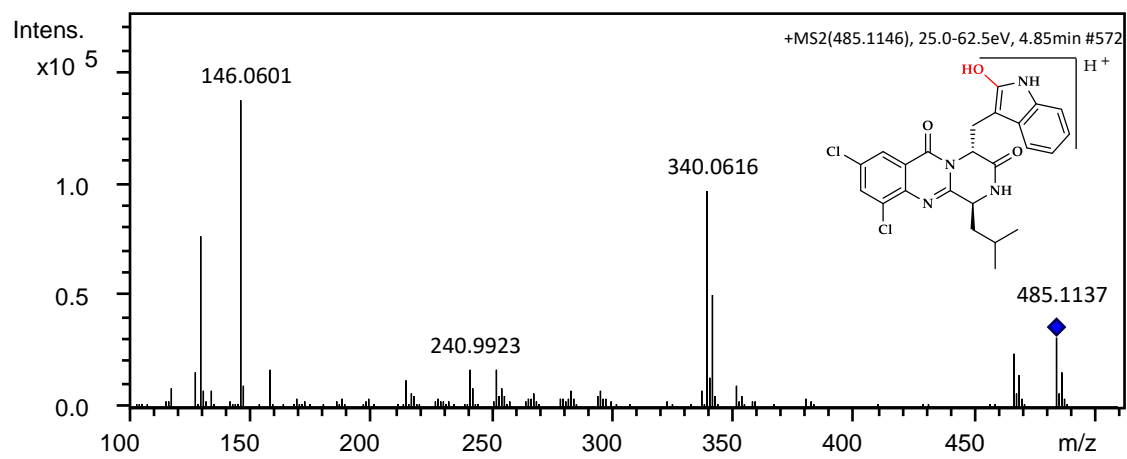

Figure S13. LC-HRMS/MS spectrum of M4,  $m/z$  485.1146.

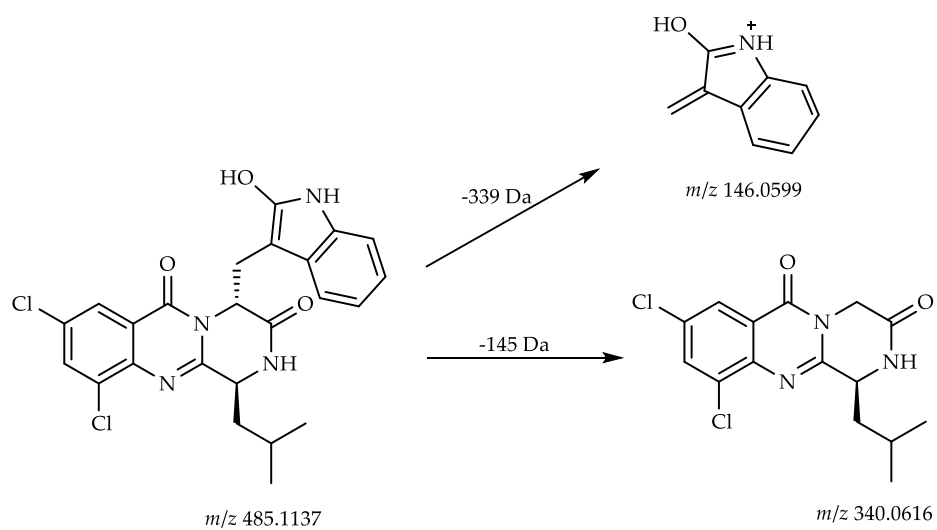

Figure S14. Proposed fragmentation pathways of metabolite M4.

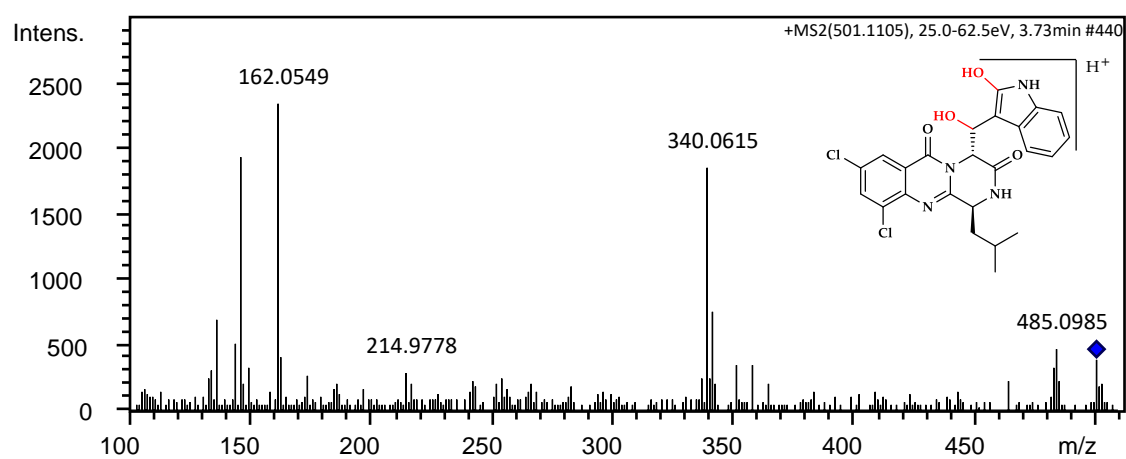

Figure S15. LC-HRMS/MS spectrum of M5,  $m/z$  501.1105.

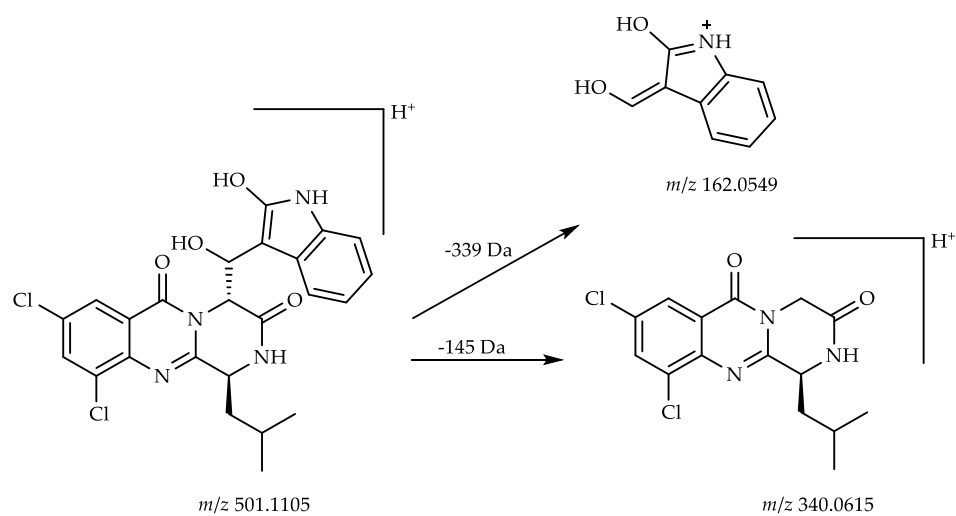

Figure S16. Proposed fragmentation pathways of metabolite M5.
